# Supplementary material for: Bullous Central Serous Chorioretinopathy: A Rare and Atypical Form of Central Serous Chorioretinopathy. A Systematic Review
Source: MDPI journal article supplement (doi:10.3390/ph13090221), 2020-08-28
Supplement: s1 [file s1]

**Table 1.** Studies included in the systematic review.

| Author            | Year | Study Design              | Sample | Ocular assessments                                                                                                                          | Outcomes                                                                                                                                                                                                                           | Level | Strength | Grade    |
|-------------------|------|---------------------------|--------|---------------------------------------------------------------------------------------------------------------------------------------------|------------------------------------------------------------------------------------------------------------------------------------------------------------------------------------------------------------------------------------|-------|----------|----------|
| Maggio E          | 2020 | Case report               | 1      | To report a case of bCSCR treated with eplerenone and subsequently with scleral thinning surgery                                            | Two months of oral eplerenone, treatment, were associated with the subretinal fluid Significant increase. Scleral thinning surgery allowed a complete SRF resolution the day after, with no recurrence at six months of follow-up. | 5     | III      | Very low |
| Aggarwal K        | 2019 | Case report               | 1      | To report a case of bCSCR treated with eplerenone.                                                                                          | Visual acuity improved and SRF resolved after 12 weeks of treatment with 25 mg of oral eplerenone.                                                                                                                                 | 5     | III      | Very low |
| Ramos-Yau EC      | 2018 | Case report               | 1      | To report a case of bCSCR treated with spironolactone.                                                                                      | Visual acuity improved and SRF resolved after 2 months of treatment with 50 mg of oral spironolactone.                                                                                                                             | 5     | III      | Very Low |
| Kowalczuk L       | 2018 | Retrospective case series | 3      | To investigate the molecular composition of SRF in bCSCR and rhegmatogenous retinal detachment using proteomics and metabolomics.           | bCSCR exhibited a distinct molecular profile compared with rhegmatogenous retinal detachment                                                                                                                                       | 5     | III      | Very low |
| Cebeci Z          | 2017 | Case report               | 1      | To report a case of bCSCR                                                                                                                   | bCSCR can be misdiagnosed as Harada's disease                                                                                                                                                                                      | 5     | III      | Very low |
| Venkatesh P       | 2016 | Case report               | 1      | To report a bCSCR case treated with scleral resection and mitomycin C 0.02%                                                                 | Exudative detachment resolved in 4 months                                                                                                                                                                                          | 5     | III      | Very low |
| Balaratnasingam C | 2016 | Retrospective case series | 21     | To compare qualitative and quantitative imaging characteristics of the choroid, retinal pigment epithelium, and retina in bCSCR versus CSCR | PED are more frequent in bCSCR and usually are hyperreflective. Choriocapillaris and choroid vessels hyperreflectivity, retinal folds and subretinal fibrin are identified more frequently in bCSCR group.                         | 5     | III      | Low      |
| John VJ           | 2014 | Case report               | 1      | To report a bCSCR case treated internal drainage by vitrectomy along with a scleral buckle placement and silicon oil tamponade              | After one year silicon oil was removed and OCT showed no subretinal fluid                                                                                                                                                          | 5     | III      | Very low |

|               |      |                           |   |                                                                                                                        |                                                                                                                                                                                                      |   |     |          |
|---------------|------|---------------------------|---|------------------------------------------------------------------------------------------------------------------------|------------------------------------------------------------------------------------------------------------------------------------------------------------------------------------------------------|---|-----|----------|
| Lee SB        | 2013 | Case report               | 1 | Bilateral central serous chorioretinopathy with retinal pigment epithelium tears following epidural steroid injection. | Epidural steroids injection could be a risk factor for bCSCR development                                                                                                                             | 5 | III | Very low |
| Kawamura R    | 2012 | Retrospective case series | 8 | To report treatment of bCSCR with transpupillary thermotherapy                                                         | Transpupillary thermotherapy seems to be effective for bCSCR treatment in the short term                                                                                                             | 5 | III | Low      |
| Ng WW         | 2011 | Case report               | 1 | To report half-dose verteporfin photodynamic therapy for treatment of bCSCR.                                           | Three months after photodynamic therapy, there was complete resolution of SRF and bullous retinal detachment.                                                                                        | 5 | III | Very low |
| Wykoff CC     | 2009 | Case report               | 1 | To report treatment of bCSCR with reduced fluence verteporfin photodynamic therapy.                                    | Photodynamic therapy can be a therapeutic option.<br>Anti-VEGF Intravitreal injection had no clinical benefit.                                                                                       | 5 | III | Very low |
| Barbazetto IA | 2009 | Case report               | 1 | To report a case of bCSCR complicated by peripheral neovascularization                                                 | Focal laser photocoagulation to the active retinal pigment epithelial leaks in the posterior pole resulted in resolution of the bullous detachment and regression of the retinal neovascularization. | 5 | III | Very low |
| Kunavisarut P | 2009 | Retrospective case series | 7 | To describe clinical features of bCSCR                                                                                 | Early diagnosis of bCSCR prevents the complications from harmful medications as well as unnecessary surgery                                                                                          | 5 | III | Low      |
| Williams P    | 2009 | Case report               | 1 | A pituitary adenoma was discovered by neuroimaging in a patient with bilateral bCSCR                                   | Bilateral bCSCR can be a rare presentation of pituitary adenoma.                                                                                                                                     | 5 | III | Very low |
| Fawzi AA      | 2006 | Retrospective case series | 8 | To report the rate of bCSCR after solid organ transplantation.                                                         | Organ transplantation is a risk factor for bCSCR development                                                                                                                                         | 5 | III | Low      |
| Kang JE       | 2006 | Case report               | 1 | A patient with bCSCR was treated with vitrectomy and internal drainage of subretinal fluid.                            | The retina was attached successfully                                                                                                                                                                 | 5 | III | Very low |
| Chen JC       | 2005 | Case report               | 1 | To report a case of atypical CSCR                                                                                      | Failure to differentiate this condition from inflammatory disease of the retina and choroid may result in inappropriate use of                                                                       | 5 | III | Very low |

|             |      |                                       |    |                                                                                                                   |                                                                                                                                                                 |   |     |          |
|-------------|------|---------------------------------------|----|-------------------------------------------------------------------------------------------------------------------|-----------------------------------------------------------------------------------------------------------------------------------------------------------------|---|-----|----------|
|             |      |                                       |    |                                                                                                                   | corticosteroids, leading to exacerbation of the condition and permanent visual loss.                                                                            |   |     |          |
| Chan WM     | 2004 | Retrospective case series             | 2  | To report two cases of bCSCR presenting with peripheral retinal neovascularization                                | The final visual prognosis is, in general, related to the duration of the retinal detachment, healthiness of the RPE, and any formation of submacular fibrosis. | 5 | III | Low      |
| Chen HC     | 2003 | Case report                           | 1  | To report treatment of bCSCR with pars plana vitrectomy associated with trans-scleral drainage                    | Immediate retinal reattachment without the need of retinotomy                                                                                                   | 5 | III | Very low |
| Otsuka S    | 2002 | Consecutive observational case series | 25 | Understanding of the long-term course and visual outcome of a severe variant of central serous chorioretinopathy. | Exudative chorioretinal lesions are self-limited or respond to photocoagulation. Recurrence is common.                                                          | 4 | III | Low      |
| Adan A      | 2001 | Case report                           | 1  | To report a case bCSCR treated with pars plana vitrectomy combined with trans-scleral drainage                    | Immediate retinal reattachment without the need of retinotomy                                                                                                   | 5 | III | Very low |
| Sahu DK     | 2000 | Retrospective case series             | 13 | To compare argon laser photocoagulation versus no observation                                                     | Laser treatment did not offer additional benefit over the natural course of the disease                                                                         | 5 | III | Low      |
| Uyama M     | 1999 | Retrospective case series             | 45 | To clarify the pathophysiology of multifocal posterior pigment epitheliopathy, or bullous retinal detachment      | Involvement of the RPE may be secondary, and then the disease becomes manifest with exudative retinal detachment.                                               | 5 | III | Low      |
| Sharma T    | 1998 | Retrospective case series             | 29 | To report treatment of bCSCR with argon photocoagulation                                                          | Retinal reattachment was obtained in all cases and visual acuity improved >2 lines in 68.9% of patients.                                                        | 5 | III | Low      |
| Yang CM     | 1998 | Case report                           | 1  | To report a misdiagnosis of bCSCR                                                                                 | Suspect bCSCR in patients with exudative retinal detachment, as the use of steroids is usually not only unnecessary but can also be harmful.                    | 5 | III | Very low |
| Hooymans JM | 1998 | Case report                           | 1  | To report an atypical form of CSCR in one patient assuming systemic corticosteroids                               | Systemic steroids could be a risk factor for bCSCR development                                                                                                  | 5 | III | Very low |
| Gass JD     | 1995 | Case report                           | 3  | To report an atypical form of CSCR in three patients assuming systemic corticosteroids                            | Systemic steroids could be a risk factor for bCSCR development                                                                                                  | 5 | III | Low      |

|              |      |                           |   |                                                                                                               |                                                                                                                                            |   |     |          |
|--------------|------|---------------------------|---|---------------------------------------------------------------------------------------------------------------|--------------------------------------------------------------------------------------------------------------------------------------------|---|-----|----------|
| Gass JD      | 1991 | Case series               | 6 | To report an atypical form of CSCR in six pregnant women                                                      | Pregnancy could be a risk factor for bCSCR development                                                                                     | 5 | III | Low      |
| Schreiber JB | 1989 | Case report               | 1 | Crohn's disease complicated by bCSCR                                                                          | Another ophthalmologic complication of inflammatory bowel disease.                                                                         | 3 | III | Very low |
| Akiyama K    | 1987 | Retrospective case series | 3 | To report three cases of bCSCR examined during a follow-up ranging from 2 to ten years.                       | Large areas of RPE degeneration were observed in all patients, Besides, one showed a retinal neovascularization.                           | 3 | III | Low      |
| Mazzuca DE   | 1986 | Case report               | 1 | To characterize bCSCR                                                                                         | bCSCR is frequently misdiagnosed and subsequently treated improperly                                                                       | 3 | III | Very low |
| Kaneko E     | 1985 | Case report               | 1 | Ulcerative colitis complicated by idiopathic central serous chorioretinopathy with bullous retinal detachment | Steroid therapy was not effective on the ocular disorder.                                                                                  | 5 | III | Very low |
| Gass JD      | 1973 | Case report               | 1 | To describe the first case of bCSCR in literature                                                             | An atypical form of CSCR in which a subretinal exudation at the posterior pole is associated with an inferior exudative retinal detachment | 5 | III | Very low |

bCSCR: bullous central serous chorioretinopathy, SRF: subretinal fluid, VEGF: vascular endothelial growth factor.
